# Supplementary material
Source: PubMed Central journal article supplement (PMC2778138)
Supplement: tx900225c_si_002.pdf [file tx900225c_si_002.pdf]

**Differential Base Stacking Interactions Induced by Trimethylene Interstrand DNA  
Cross-links in the 5'-CpG-3' and 5'-GpC-3' Sequence Contexts**

Revised Manuscript

Hai Huang, Patricia A. Dooley, Constance M. Harris, Thomas M. Harris, and Michael P.  
Stone\*

**Supporting Information**

Department of Chemistry, Center in Molecular Toxicology, and Center for Structural  
Biology, Vanderbilt University, Nashville, Tennessee 37235

\*To whom correspondence should be addressed. Tel: 615-322-2589; Fax: 615-322-7591;

E-mail: michael.p.stone@vanderbilt.edu.

Current Address for P.A.D: Patricia A. Dooley, Bard College at Simon's Rock, Great  
Barrington, MA 01230; [pdooley@simons-rock.edu](mailto:pdooley@simons-rock.edu)

**Running Title:** Trimethylene Interstrand Cross-Links

## **Table of Contents**

**Table S1.** Backbone torsion angles of the average structure of the 5'-CpX-3' cross-link

**Table S2.** Sugar torsion angles of the average structure of the 5'-CpX-3' cross-link

**Table S3.** Backbone torsion angles of the average structure of the 5'-XpC-3' cross-link

**Table S4.** Sugar torsion angles of the average structure of the 5'-XpC-3' cross-link

**Figure S1.** New refined structure of the trimethylene interstrand cross-link in the 5'-CpX-3' sequence compared with the previously reported structure.

**Figure S2.** New refined structure of the trimethylene interstrand cross-link in the 5'-XpC-3' sequence compared with the previously reported structure.

**Figure S3.** Base pairing parameters of the trimethylene cross-links.

**Table S1.** Backbone Torsion Angles of the Average Structure of the 5'-CpX-3' Cross-Link Compared with the Experimental Data.

| nucleotide     | experimental (°) <sup>a</sup> |            | average structure (°) |         |          |          |            |         |        |
|----------------|-------------------------------|------------|-----------------------|---------|----------|----------|------------|---------|--------|
|                | $\delta$                      | $\epsilon$ | $\alpha$              | $\beta$ | $\gamma$ | $\delta$ | $\epsilon$ | $\zeta$ | $\chi$ |
| A <sup>1</sup> | 173                           | -141       |                       |         | 63       | 97       | -177       | -97     | -82    |
| G <sup>2</sup> | 160                           | -140       | -80                   | 65      | 165      | 148      | -166       | -79     | -140   |
| G <sup>3</sup> | 138                           | -135       | -72                   | -177    | 43       | 128      | -179       | -94     | -106   |
| C <sup>4</sup> | 88                            | -144       | -62                   | 168     | 53       | 97       | -160       | -72     | -130   |
| X <sup>5</sup> | 129                           | -137       | -74                   | 169     | 45       | 139      | -77        | 134     | -85    |
| C <sup>6</sup> | 171                           | -143       | -85                   | 145     | 53       | 128      | -165       | -83     | -128   |
| C <sup>7</sup> | 94                            | -142       | -77                   | 171     | 50       | 90       | -174       | -87     | -132   |
| T <sup>8</sup> |                               |            | -63                   | 173     | 60       | 142      |            |         | -98    |

<sup>a</sup> Cited from *J. Am. Chem. Soc.* **2001**, *123*, 1730-1739.

**Table S2.** Sugar Torsion Angles of the Average Structure of the 5'-CpX-3' Cross-Link Compared with the Experimental Data.

| nucleotide     | Experimental <sup>a</sup> |        | average structure |        |                        |
|----------------|---------------------------|--------|-------------------|--------|------------------------|
|                | P (°)                     | Φm (°) | P (°)             | Φm (°) | puckering              |
| A <sup>1</sup> | 201                       | 49     | 103               | 41     | O <sub>4</sub> , -endo |
| G <sup>2</sup> | 180                       | 44     | 183               | 33     | C <sub>3</sub> , -exo  |
| G <sup>3</sup> | 149                       | 39     | 142               | 36     | C <sub>1</sub> , -exo  |
| C <sup>4</sup> | 82                        | 44     | 90                | 36     | O <sub>4</sub> , -endo |
| X <sup>5</sup> | 136                       | 44     | 142               | 46     | C <sub>1</sub> , -exo  |
| C <sup>6</sup> | 237                       | 49     | 142               | 33     | C <sub>1</sub> , -exo  |
| C <sup>7</sup> | 80                        | 34     | 78                | 35     | O <sub>4</sub> , -endo |
| T <sup>8</sup> |                           |        | 160               | 33     | C <sub>2</sub> , -endo |

<sup>a</sup> Cited from *J. Am. Chem. Soc.* **2001**, *123*, 1730-1739.

**Table S3.** Backbone Torsion Angles of the Average Structure of the 5' -XpC-3' Cross-Link Compared with the Experimental Data.

| residue        | Experimental <sup>a</sup> | average structure |         |          |          |            |         |        |
|----------------|---------------------------|-------------------|---------|----------|----------|------------|---------|--------|
|                | $\delta$                  | $\alpha$          | $\beta$ | $\gamma$ | $\delta$ | $\epsilon$ | $\zeta$ | $\chi$ |
| T <sup>1</sup> | 113                       |                   |         | -175     | 126      | -180       | -91     | -116   |
| C <sup>2</sup> | 130                       | -58               | 162     | 65       | 107      | -173       | -87     | -127   |
| C <sup>3</sup> | 130                       | -64               | 171     | 56       | 127      | -170       | -92     | -117   |
| X <sup>4</sup> | 138                       | -80               | -168    | 39       | 155      | -70        | 164     | -86    |
| C <sup>5</sup> | 138                       | -98               | 139     | 53       | 92       | -178       | -100    | -126   |
| G <sup>6</sup> | 138                       | -62               | 170     | 63       | 129      | -175       | -93     | -108   |
| G <sup>7</sup> | 130                       | -64               | 168     | 58       | 122      | -174       | -93     | -116   |
| A <sup>8</sup> | 113                       | -65               | 174     | 54       | 134      |            |         | -106   |

<sup>a</sup> Averaged from data in *J. Am. Chem. Soc.* **2003**, *125*, 62-72.

**Table S4.** Sugar Torsion Angles of the Average Structure of the 5'-XpC-3' Cross-Link Compared with the Experimental Data.

| nucleotide     | Experimental <sup>a</sup> | average structure |        |                        |
|----------------|---------------------------|-------------------|--------|------------------------|
|                | P (°)                     | P (°)             | Φm (°) | puckering              |
| T <sup>1</sup> | 86                        | 145               | 24     | C <sub>2</sub> , -endo |
| C <sup>2</sup> | 131                       | 111               | 35     | C <sub>1</sub> , -exo  |
| C <sup>3</sup> | 131                       | 139               | 36     | C <sub>1</sub> , -exo  |
| X <sup>4</sup> | 141                       | 162               | 40     | C <sub>2</sub> , -endo |
| C <sup>5</sup> | 141                       | 91                | 35     | O <sub>4</sub> , -endo |
| G <sup>6</sup> | 141                       | 158               | 25     | C <sub>2</sub> , -endo |
| G <sup>7</sup> | 141                       | 132               | 33     | C <sub>1</sub> , -exo  |
| A <sup>8</sup> | 86                        | 144               | 36     | C <sub>2</sub> , -endo |

<sup>a</sup> Averaged from data in *J. Am. Chem. Soc.* **2003**, 125, 62-72.

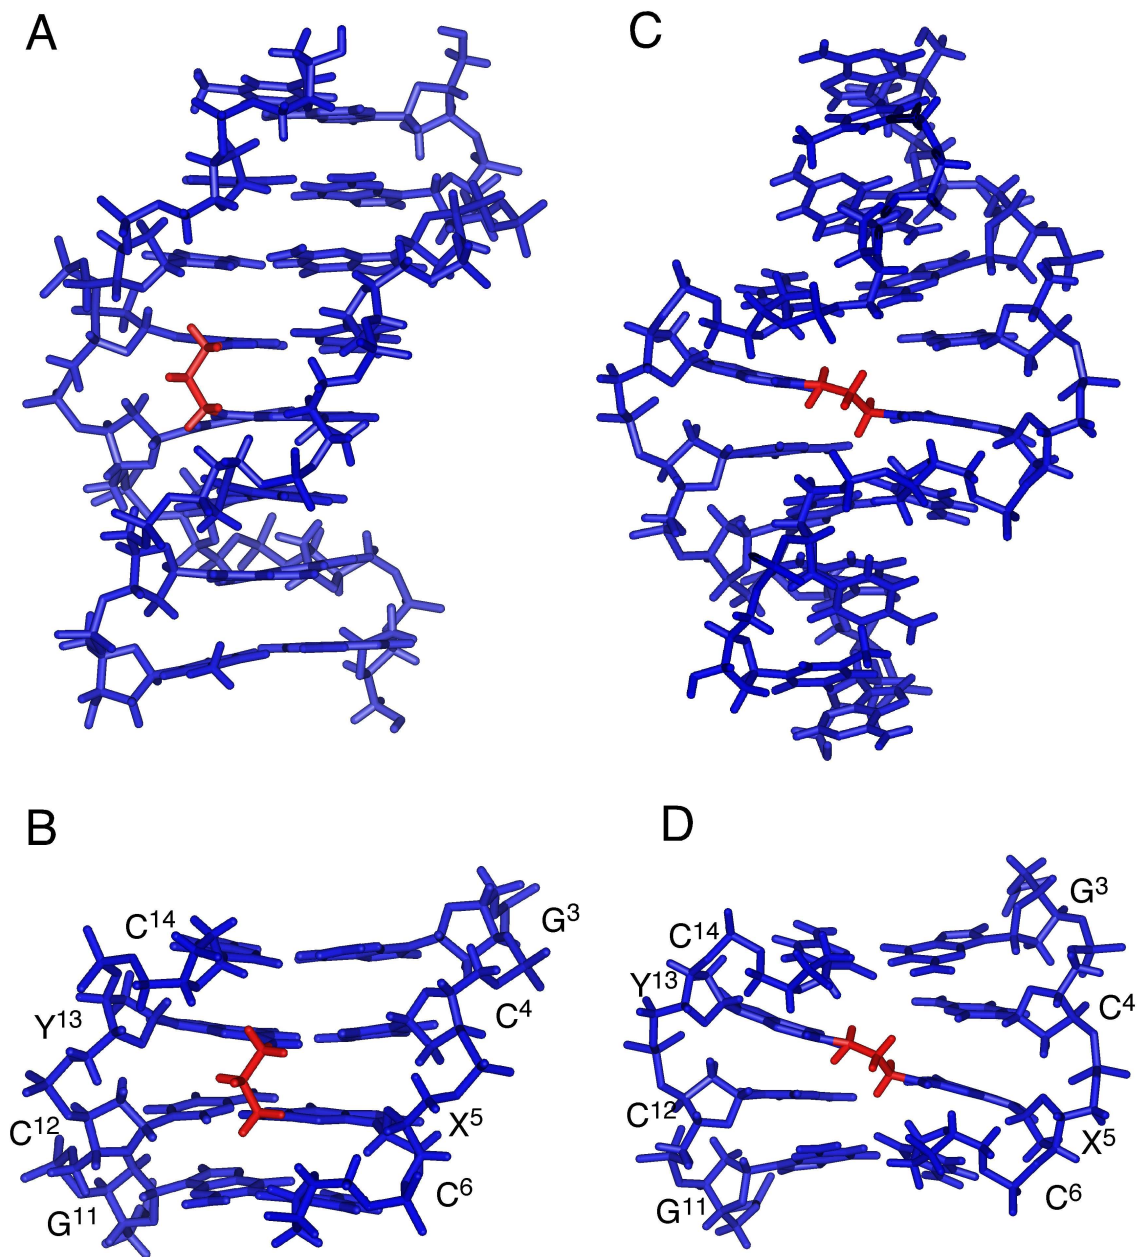

**Figure S1.** Refined structures of the trimethylene interstrand cross-link in the 5'-CpX-3' sequence: (A) new refined structure; (B) expanded view of the new structure from the minor groove; (C) structure refined by Dooley et al. (PDB ID: 1HZ2); (D) expanded view of the structure refined by Dooley et al. from the minor groove. Blue and red sticks represent the nucleotide and the tether, respectively.

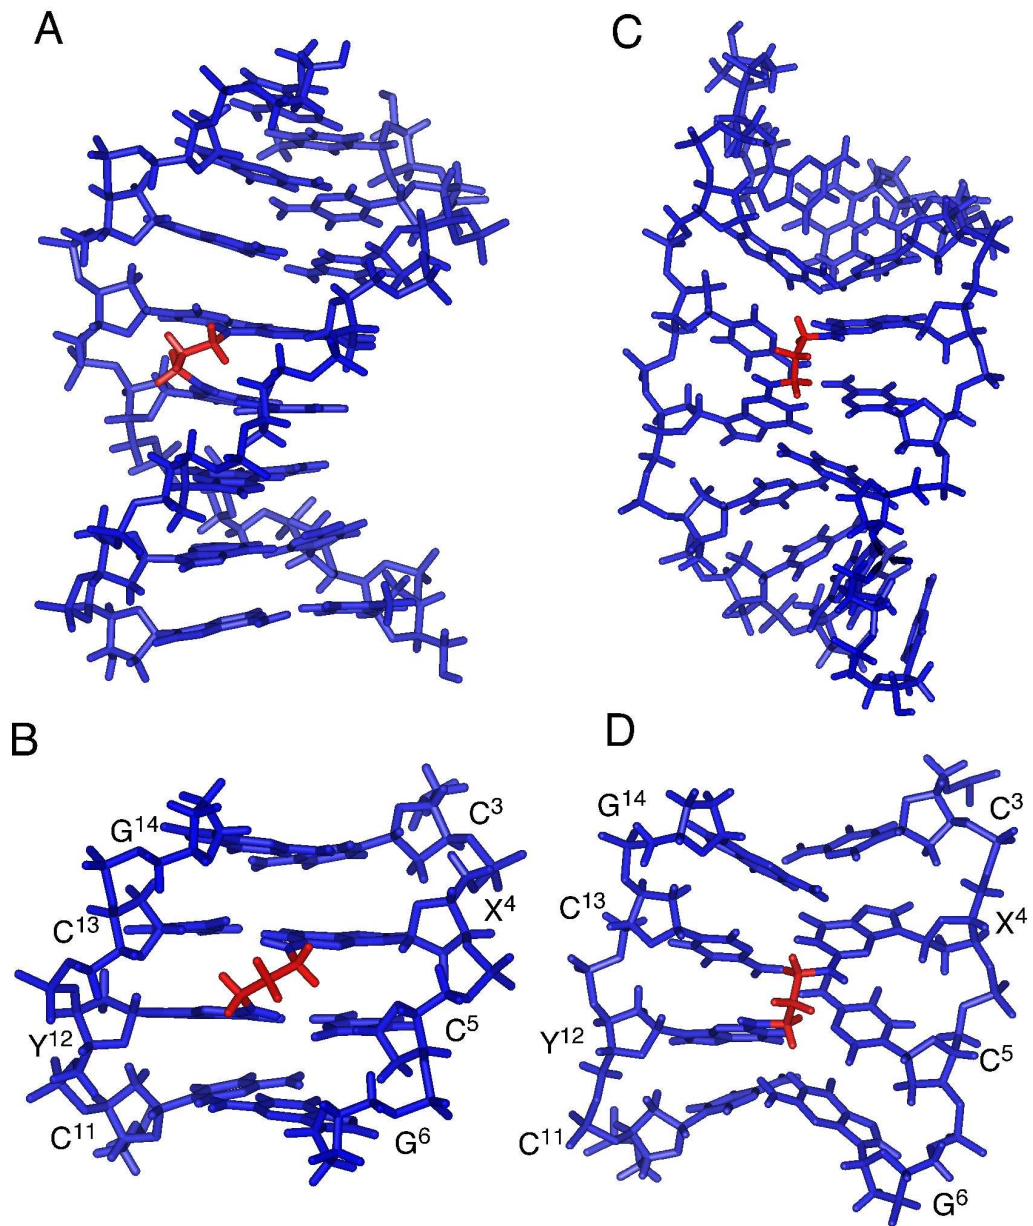

**Figure S2.** Refined structures of the trimethylene interstrand cross-link in the 5'-XpC-3' sequence: (A) new refined structure; (B) expanded view of the new structure from the minor groove; (C) structure refined by Dooley et al. (PDB ID: 1LUH); (D) expanded view of the structure refined by Dooley et al. from the minor groove. Blue and red sticks represent the nucleotide and the tether, respectively.



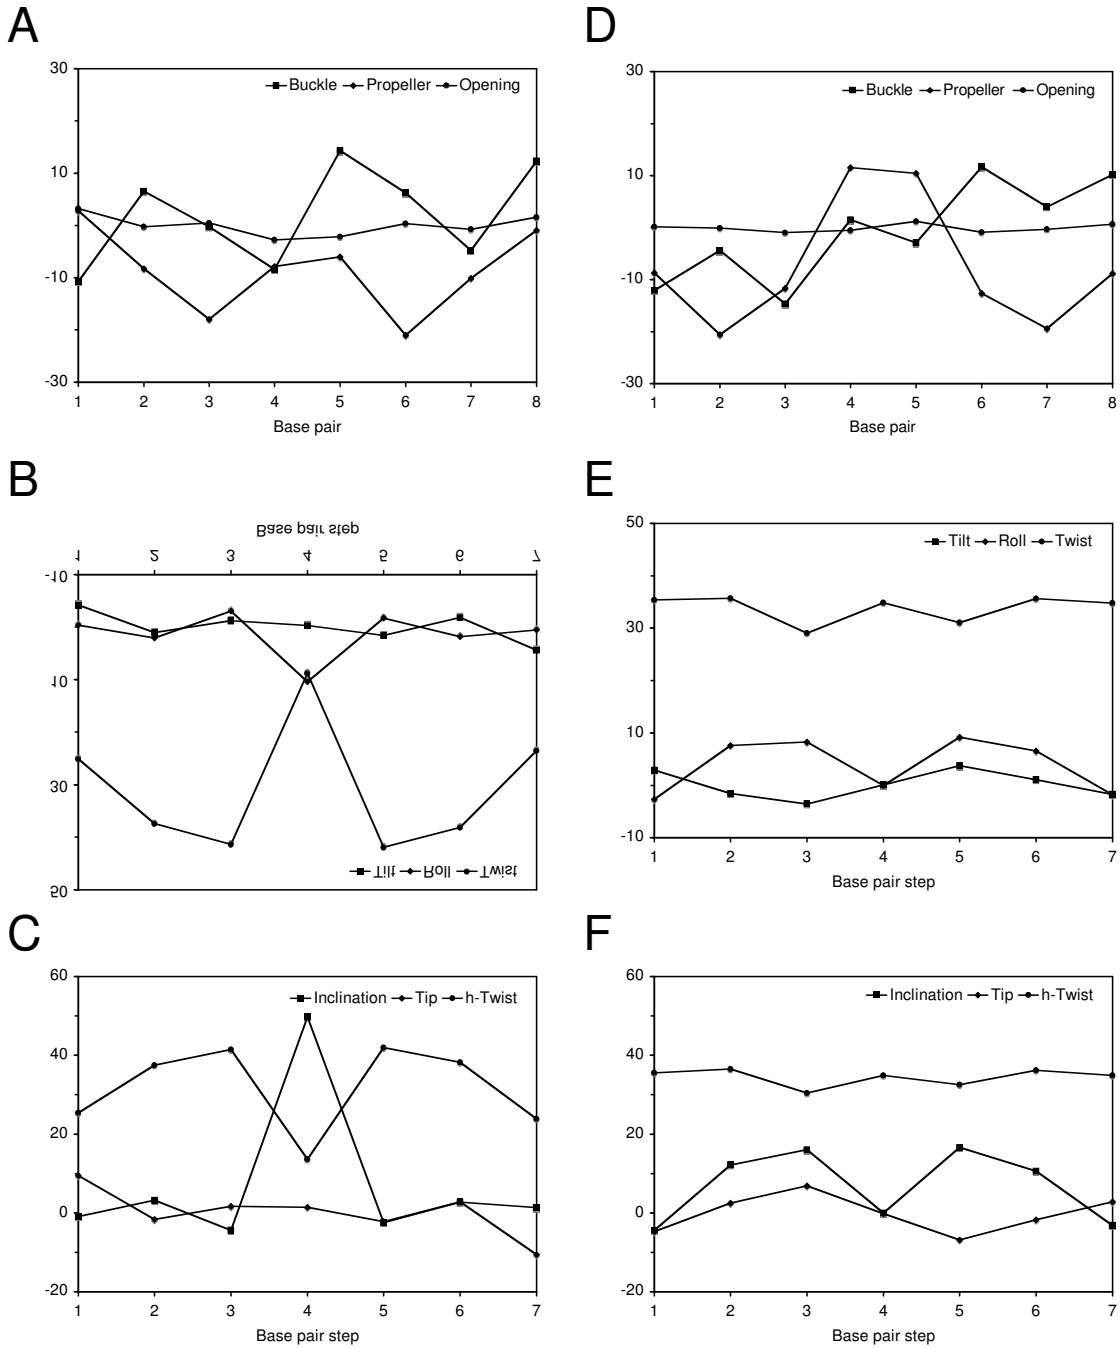

**Figure S3.** Base pairing parameters of the trimethylene cross-links: (A-C) In the 5'-CpX-3' sequence context, significant roll, twist, inclination and h-twist of the cross-linked base pairs are induced; (D-F) In the 5'-XpC-3' sequence context, significant propeller of the cross-linked base pairs is induced.
